# Supplementary material for: Application of a Pharmacogenetics-Based Precision Medicine Model (5SPM) to Psychotic Patients That Presented Poor Response to Neuroleptic Therapy
Source: MDPI journal article supplement (doi:10.3390/jpm10040289), 2020-12-18
Supplement: s1 [file s1]

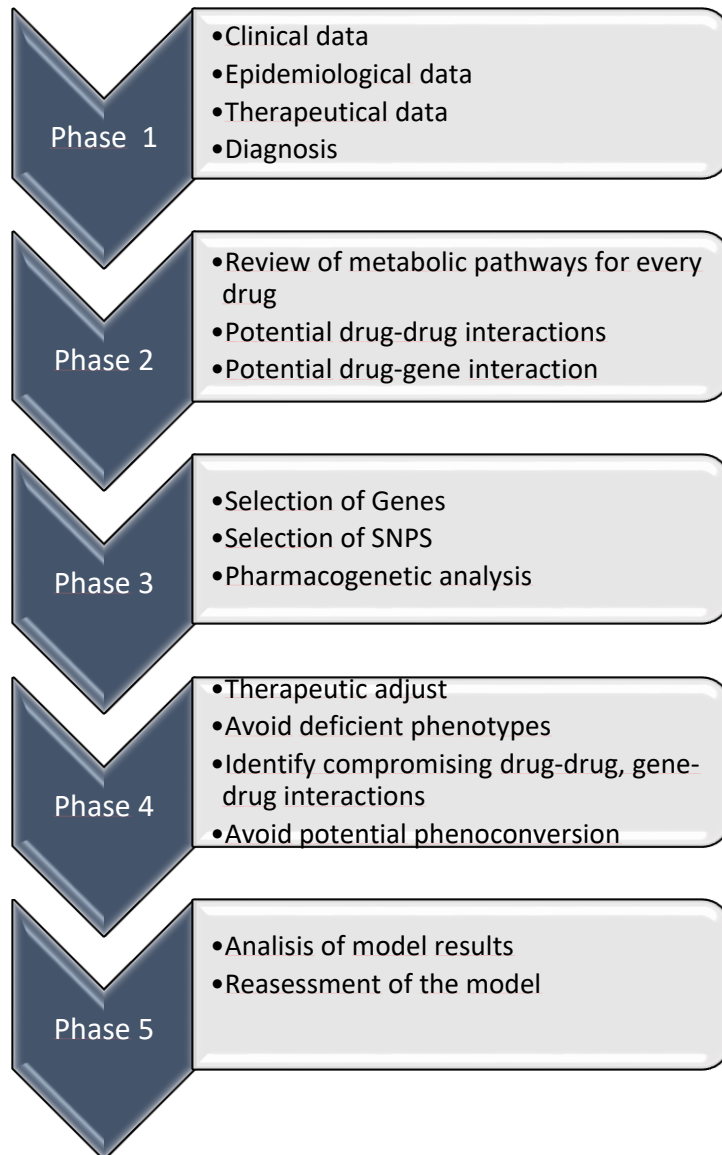

**Suppl. 1.** 5 Step Precision Medicine Model.
